# Supplementary material for: FSH/LH-Dependent Upregulation of Ahr in Murine Granulosa Cells Is Controlled by PKA Signaling and Involves Epigenetic Regulation
Source: PubMed Central journal article supplement (PMC6627912; doi:10.3390/ijms20123068), 2019-06-23
Supplement: ijms-20-03068-s001.pdf [file ijms-20-03068-s001.pdf]

## Supplementary Figures S1-S5.

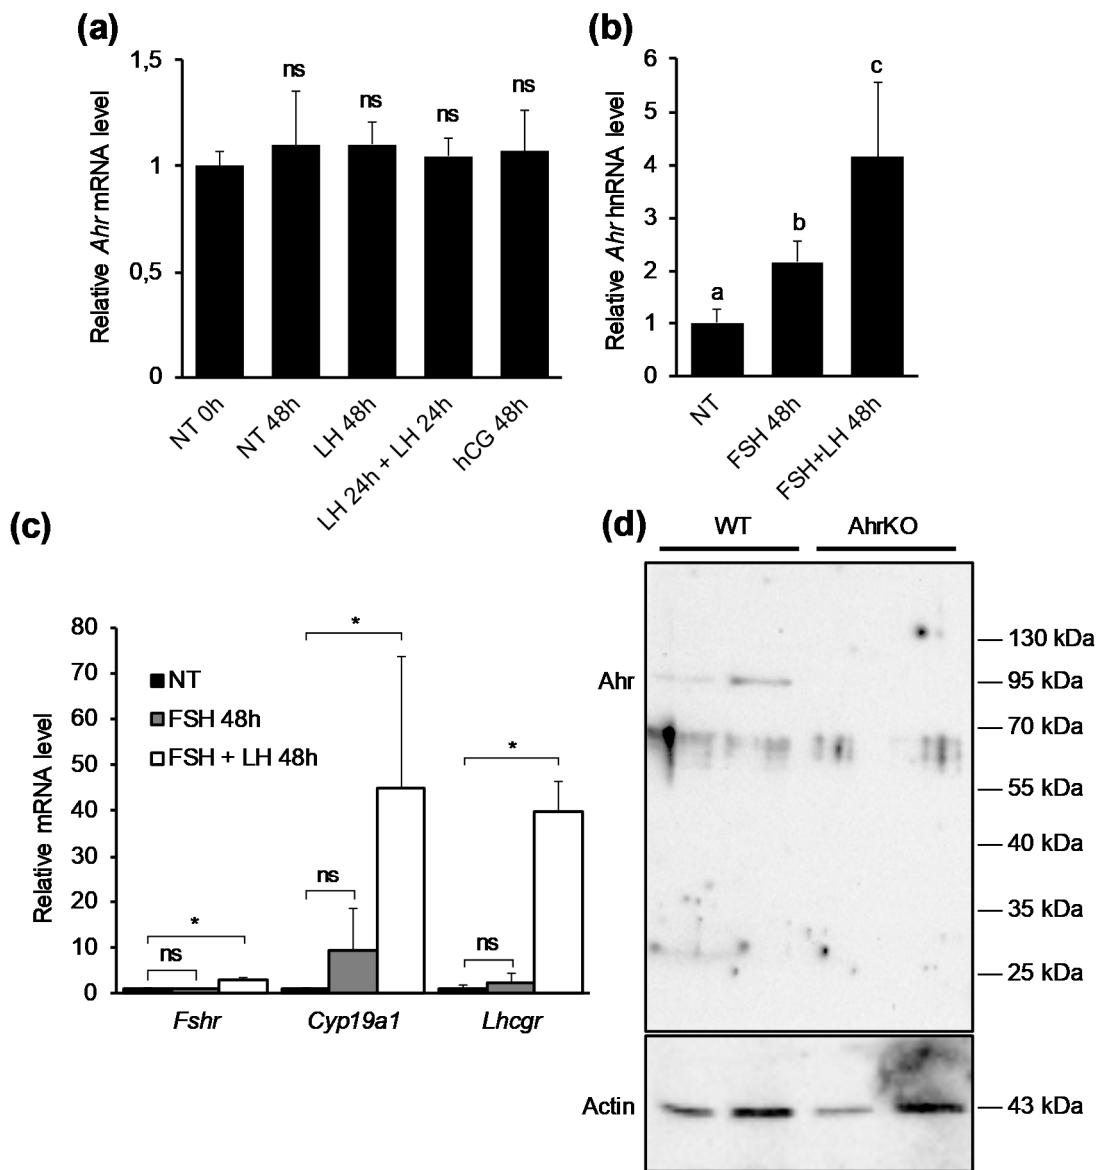

**Supplementary Figure S1. The effect of gonadotropins on gene expression in granulosa cells (GCs) *in vivo*.** (a) Mice were injected once (LH 48h, hCG 48h) or twice (LH 24h + LH 24h) with 5 IU of LH, hCG or vehicle (NT) and lysates were collected from GCs isolated before (0 h) or 48 h later. *Ahr* mRNA levels were measured by qPCR. Data are presented as means  $\pm$  SD from three independent experiments. (b) Mice were injected in total 4 times (every 12 h) with FSH (1.5 IU) or FSH (1.5 IU) + LH (1.25 IU) and lysates were collected from GCs isolated before (NT) or 48 h after initial injection. *Ahr* hnRNA levels were measured by qPCR. Data are presented as means  $\pm$  SD from three independent experiments. (c) Mice were injected in total 4 times (every 12 h) with FSH (1.5 IU) or FSH (1.5 IU) + LH (1.25 IU) and lysates were collected from GCs isolated before (NT) or 48 h after initial injection. *Fshr*, *Cyp19a1* and *Lhcgr* mRNA levels were measured by qPCR. Data are presented as means  $\pm$  SD from three independent experiments. (d) Western blot analysis of Ahr antibody using WT and AhrKO mice. ns – non-

significant difference from NT 0h ( $p > 0.05$ ). Bars with different superscripts are significantly different ( $p < 0.05$ ). \* $p < 0.05$  vs NT.

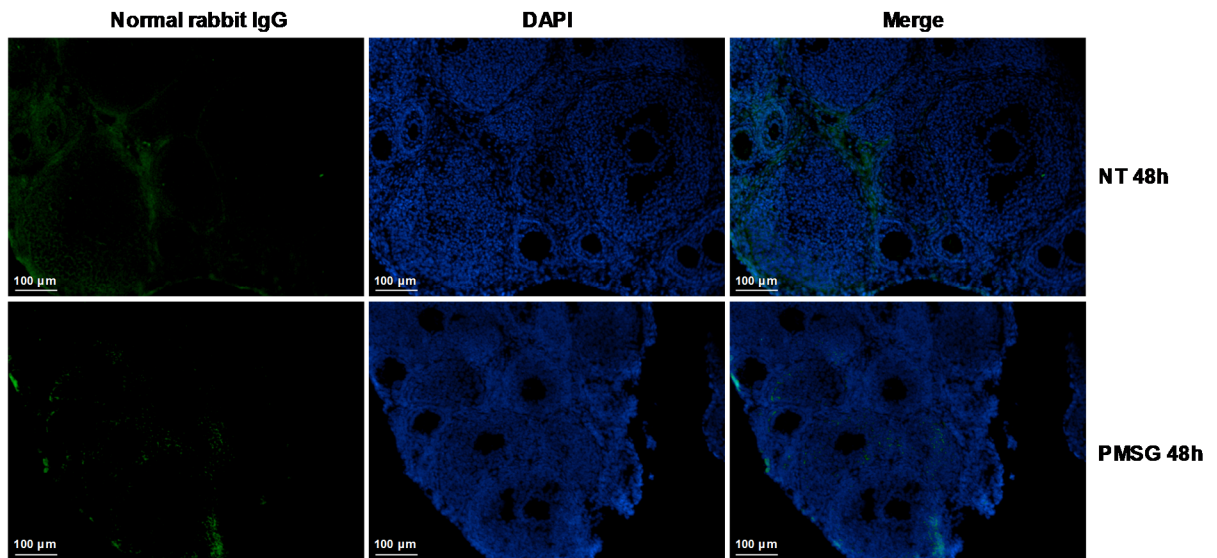

**Supplementary Figure S2. Immunofluorescence analysis of isotype control for Ahr-specific antibody in ovary following gonadotropin treatment *in vivo*.** Mice were injected with 5 IU of PMSG or vehicle (NT) and ovaries were isolated 48 h later. Representative images of immunofluorescence analysis using Normal rabbit IgG as primary antibody (green). Nuclei were stained with DAPI (blue). Scale bar, 100  $\mu$ m.

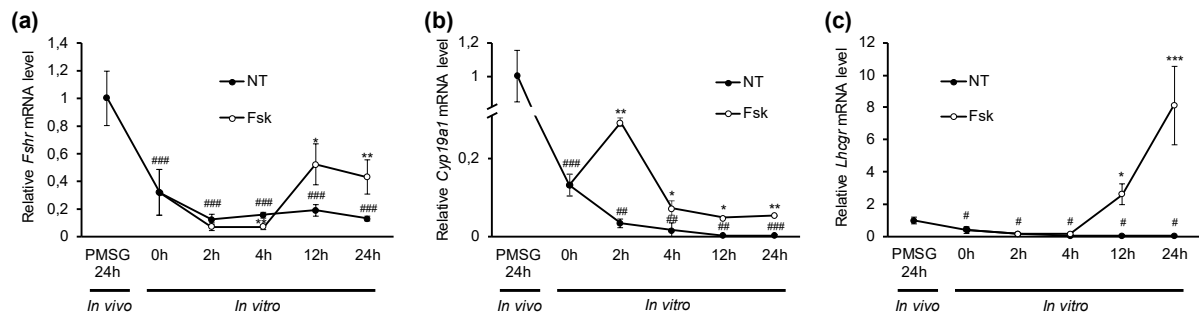

**Supplementary Figure S3. The effect of forskolin on the expression of follicle maturation marker genes in GCs *in vitro*.** Mice were injected with 5 IU of PMSG and GCs were isolated 24 h later, at which point GCs were subjected to qPCR analysis or cultured *in vitro*. Following attachment (2-3 h later), GCs were treated with vehicle (NT) or Fsk (10  $\mu$ M) for up to 24 h. *Fshr* (a), *Cyp19a1* (b) and *Lhcgr* (c) levels were measured by qPCR before (0 h) or at different timepoints after Fsk or vehicle was added to medium. Presented values are normalized to *Tbp* expression levels. Data are presented as means  $\pm$  SD from three independent experiments. \*, \*\* and \*\*\* indicate values of  $p < 0.05$ ,  $p < 0.01$  and  $p < 0.001$  vs NT, respectively. #, ## and ### indicate values of  $p < 0.05$ ,  $p < 0.01$  and  $p < 0.001$  vs PMSG 24 h *in vivo*, respectively.

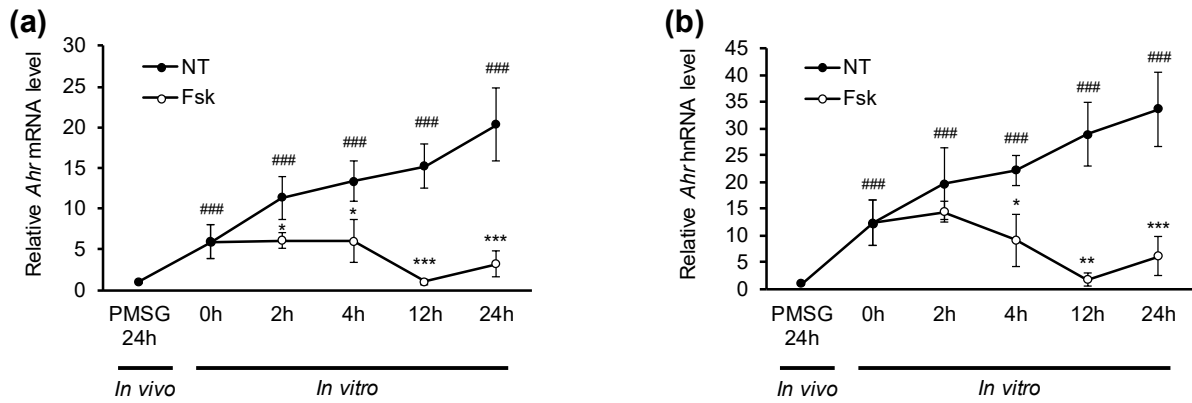

**Supplementary Figure S4. The effect of forskolin on *Ahr* expression in GCs *in vitro*.** Mice were injected with 5 IU of PMSG and GCs were isolated 24 h later, at which point GCs were subjected to qPCR analysis or cultured *in vitro*. Following attachment (2-3 h later), GCs were treated with vehicle (NT) or Fsk (10  $\mu$ M) for up to 24 h. *Ahr* mRNA (a) and hnRNA (b) levels were measured by qPCR before (0 h) or at different timepoints after Fsk or vehicle was added to medium. Data are presented as means  $\pm$  SD from three independent experiments. \*, \*\* and \*\*\* indicate values of  $p < 0.05$ ,  $p < 0.01$  and  $p < 0.001$  vs NT, respectively. #, ## and ### indicate values of  $p < 0.05$ ,  $p < 0.01$  and  $p < 0.001$  vs PMSG 24 h *in vivo*, respectively.

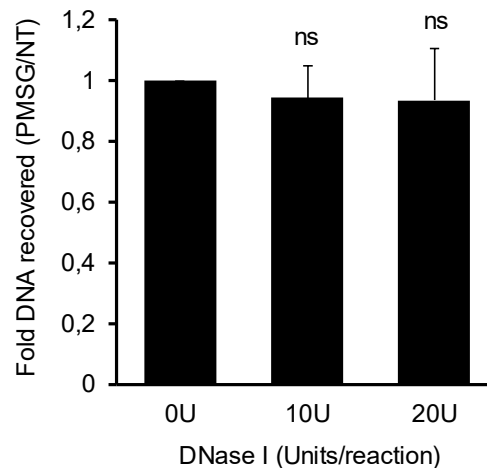

**Supplementary Figure S5. The effect of PMSG on chromatin accessibility at *Pax7* promoter.** Mice were injected with 5 IU of PMSG or vehicle (NT) and GCs were isolated 48 h later. DNA from nuclei treated with increasing concentrations of DNase I was analyzed by qPCR. The data are presented as ratio of PMSG vs NT of recovered DNA. Data are presented as means  $\pm$  SD from three independent experiments. ns – non-significant difference from 0 U ( $p > 0.05$ ).
